# Supplementary material for: Ecological Drivers of Species Distributions and Niche Overlap for Three Subterranean Termite Species in the Southern Appalachian Mountains, USA
Source: Preprints.org preprint supplement (doi:10.20944/preprints201812.0178.v2), 2019-01-17
Supplement: Supplementary file 1 [file supplementary › Figure S4.pdf]

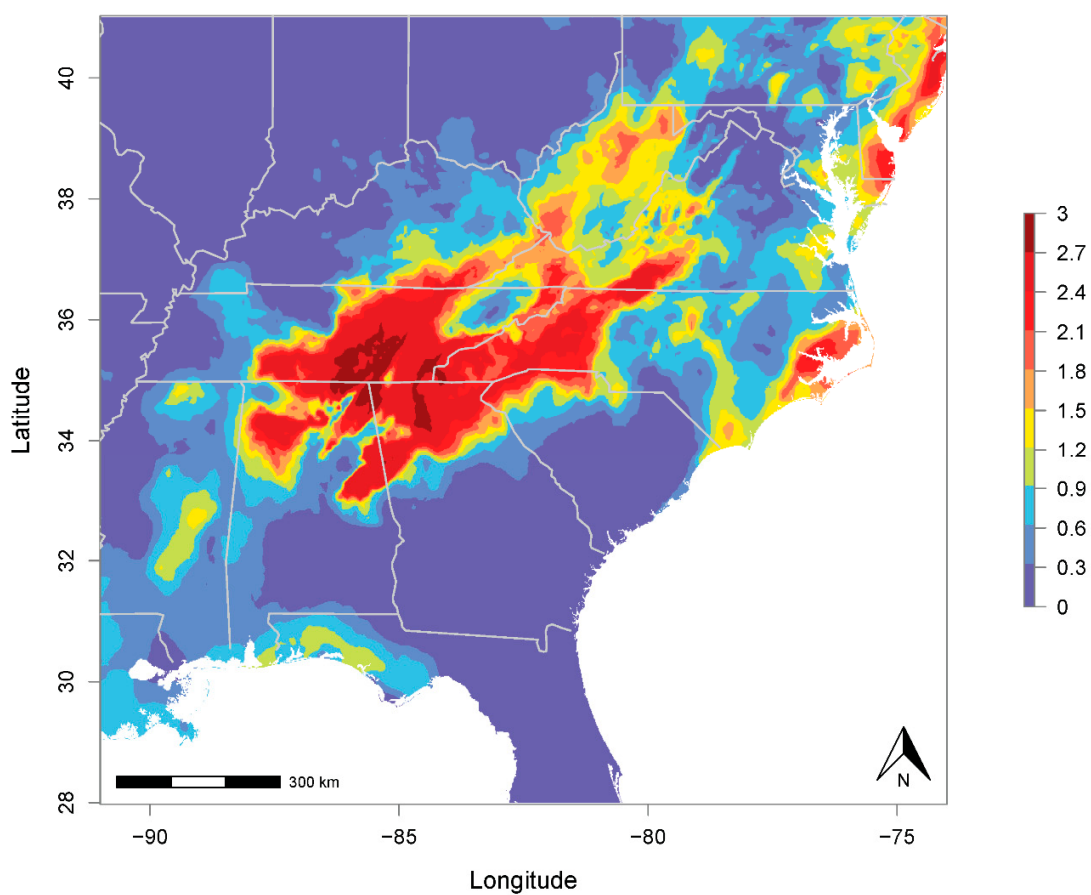

**Figure S4.** *Distributional overlap of Reticulitermes species.* Overlap is depicted based on the sum of individual species' occurrence probabilities, with the highest value being 3 (dark red), where all three species co-occur at a probability of 1. Areas with occurrence probability above 1 (green to red) must have more than one species. Areas with probability below 1 (blues) could have more than one species with probabilities lower than 0.5. Absence of all three species is shown in dark blue.
