# Supplementary material for: Ecological Drivers of Species Distributions and Niche Overlap for Three Subterranean Termite Species in the Southern Appalachian Mountains, USA
Source: Preprints.org preprint supplement (doi:10.20944/preprints201812.0178.v2), 2019-01-17
Supplement: Supplementary file 1 [file supplementary › Figure S5.pdf]

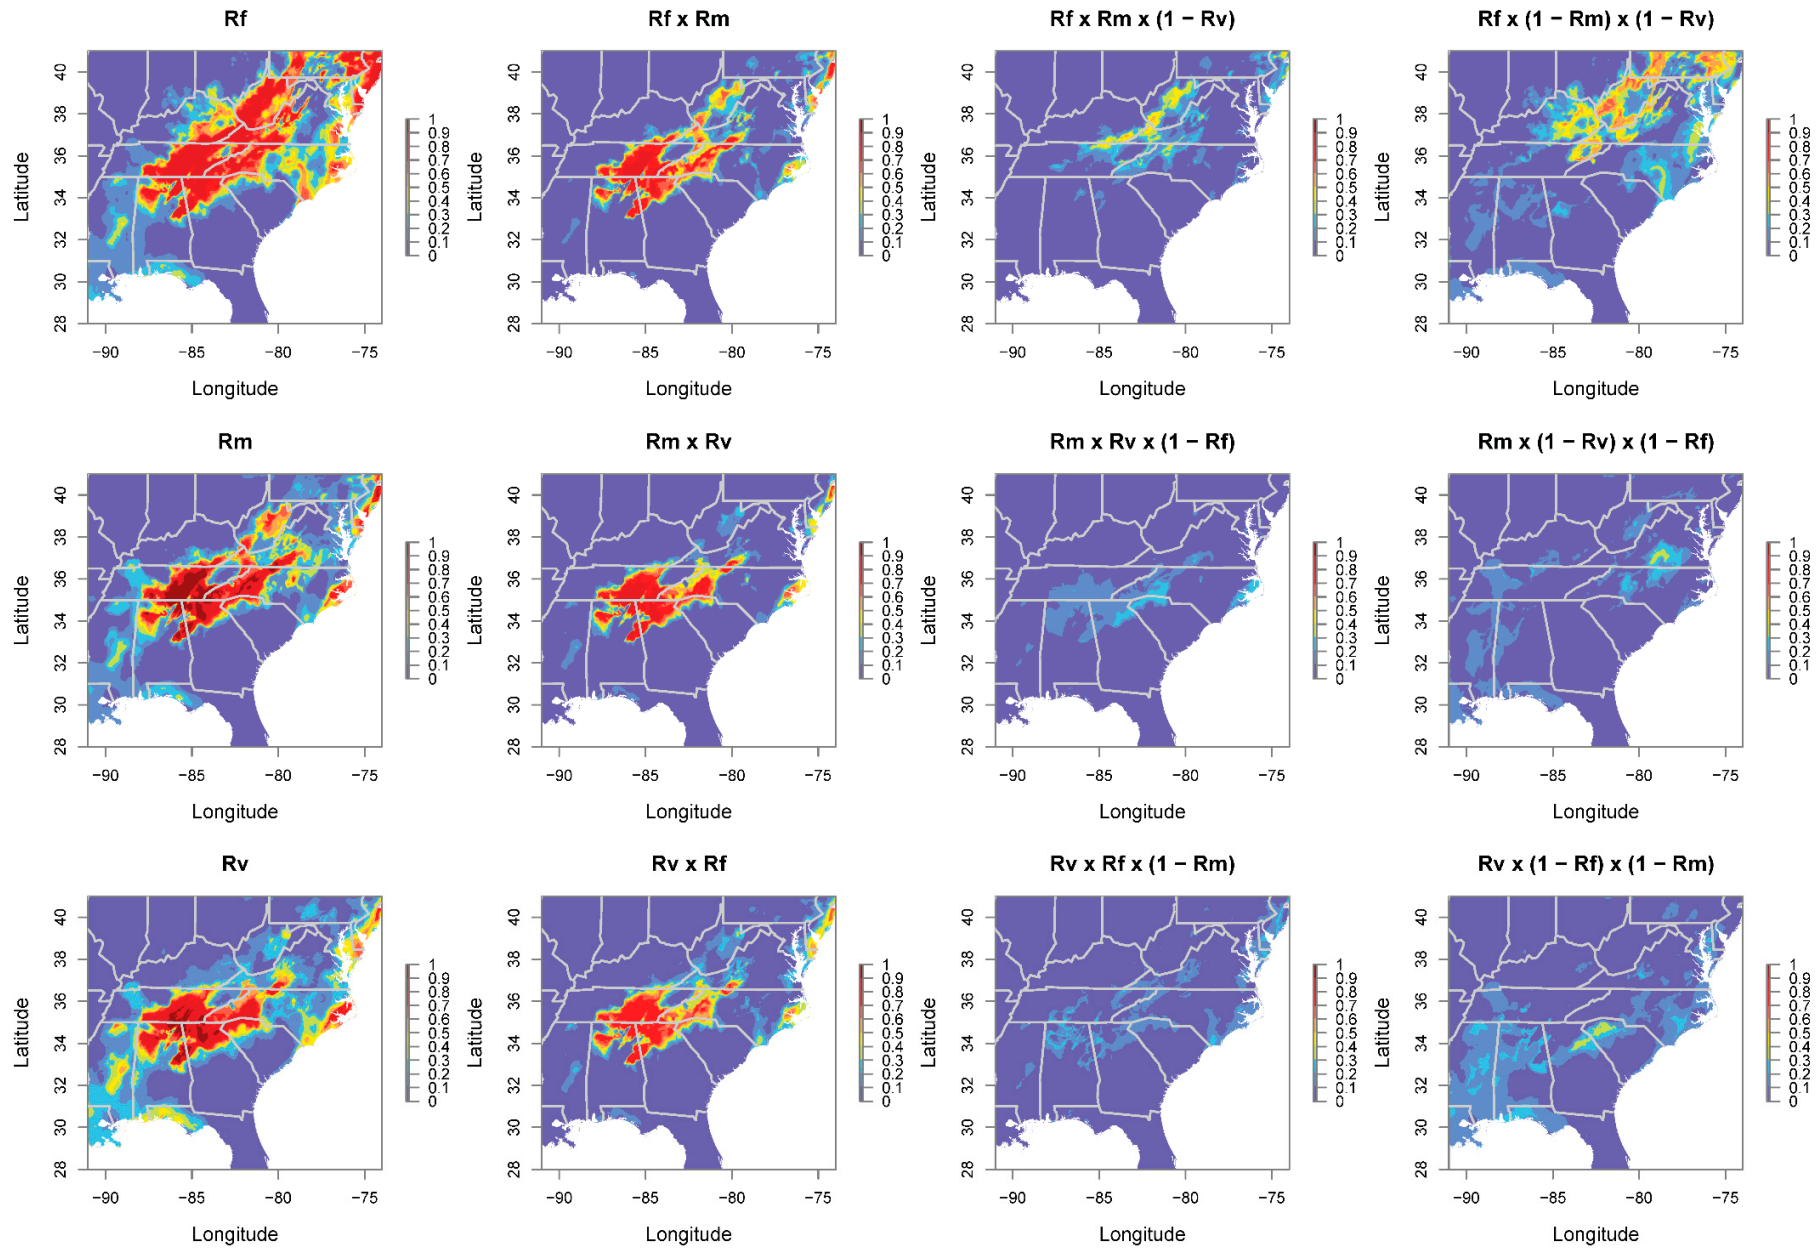

**Figure S5.** Probability of joint and exclusive occurrence of *Reticulitermes* species. The leftmost column of panels shows probability of occurrence of *R. flavipes*, *R. mallei*, and *R. virginicus* (abbreviated as *Rf*, *Rm*, and *Rv*, respectively), whereas probability of absence is denoted as  $(1 - Rf)$ ,  $(1 - Rm)$ , and  $(1 - Rv)$ . Probability of occurrence is shown on a scale from 0 (dark blue) to 1 (dark red). The second column of panels shows probability of joint occurrence of two species (without excluding the third), expressed as products: “*Rf* x *Rv*,” “*Rf* x *Rm*,” and “*Rv* x *Rm*.” The third column shows areas where two species co-occur, but the third species is absent (probability of absence:  $1 - Rf$ ,  $1 - Rm$ ,  $1 - Rv$ ). Probability of occurrence of a single species, while excluding the other two, is shown in the rightmost column.
